# Supplementary material for: Numerical Tool for Calculating Birefringence in Mirror-Substrates for Gravitational-Wave Detectors
Source: Frontiers journal article supplement (doi:10.3389/fspas.2022.881348), 2022-06-23
Supplement: Image_1.pdf [file Image_1.pdf]

## F-matrix

The tangential field direction at the intercept is naturally given by  $\mathbf{s}_1 = \hat{\mathbf{k}} \times \hat{\mathbf{N}}$  while its normal can be derived via  $\mathbf{s}_2 = \hat{\mathbf{N}} \times \mathbf{s}_1$ . Together with the electric and magnetic fields, one can construct a matrix for the convenient calculation of reflection and transmission coefficients, which I will name here in compliance with Chipman, Lam and Young ([?]) as F-matrix. With  $\mathbf{E}_{\text{tf}}$ ,  $\mathbf{E}_{\text{ts}}$ ,  $\mathbf{E}_{\text{rf}}$ , and  $\mathbf{E}_{\text{rs}}$  being the transmitted-fast, transmitted-slow, reflected-fast, and reflected-slow electric field, that matrix can be expressed as:

$$\mathbf{F} = \begin{pmatrix} \mathbf{s}_1 \cdot \hat{\mathbf{E}}_{\text{tf}} & \mathbf{s}_1 \cdot \hat{\mathbf{E}}_{\text{ts}} & \mathbf{s}_1 \cdot \hat{\mathbf{E}}_{\text{rf}} & \mathbf{s}_1 \cdot \hat{\mathbf{E}}_{\text{rs}} \\ \mathbf{s}_2 \cdot \hat{\mathbf{E}}_{\text{tf}} & \mathbf{s}_2 \cdot \hat{\mathbf{E}}_{\text{ts}} & \mathbf{s}_2 \cdot \hat{\mathbf{E}}_{\text{rf}} & \mathbf{s}_2 \cdot \hat{\mathbf{E}}_{\text{rs}} \\ \mathbf{s}_1 \cdot \mathbf{H}_{\text{tf}} & \mathbf{s}_1 \cdot \mathbf{H}_{\text{ts}} & \mathbf{s}_1 \cdot \mathbf{H}_{\text{rf}} & \mathbf{s}_1 \cdot \mathbf{H}_{\text{rs}} \\ \mathbf{s}_2 \cdot \mathbf{H}_{\text{tf}} & \mathbf{s}_2 \cdot \mathbf{H}_{\text{ts}} & \mathbf{s}_2 \cdot \mathbf{H}_{\text{rf}} & \mathbf{s}_2 \cdot \mathbf{H}_{\text{rs}} \end{pmatrix}, \quad (1)$$

where The magnetic fields are derived via

$$\mathbf{H} = n\mathbf{K} \cdot \mathbf{E}. \quad (2)$$

Note, that we don't have to use the normalized vector representation in case of the magnetic fields. The resulting transmission and reflection coefficients  $t_{\text{f/s}}$  and  $r_{\text{f/s}}$  can be derived by applying field-conservation when passing the intercept, whereas each coefficient is valid for both tangential and normal component. Thus,

$$\mathbf{t} = \mathbf{F}^{-1} \cdot \mathbf{C}, \quad \text{where} \quad \mathbf{t} = \begin{pmatrix} t_{\text{tf}} \\ t_{\text{ts}} \\ t_{\text{rf}} \\ t_{\text{rs}} \end{pmatrix} \quad \text{and} \quad \mathbf{C} = \begin{pmatrix} \mathbf{s}_1 \cdot \hat{\mathbf{E}}_{\text{inc}} \\ \mathbf{s}_2 \cdot \hat{\mathbf{E}}_{\text{inc}} \\ \mathbf{s}_1 \cdot \mathbf{H}_{\text{inc}} \\ \mathbf{s}_2 \cdot \mathbf{H}_{\text{inc}} \end{pmatrix}. \quad (3)$$

It is important to note that the  $\mathbf{C}$ -matrix of an incoming field has to be calculated for the two eigenpolarizations of the incoming medium (in an isotropic environment, these would be the S and P polarization). Hence, there are two transmission matrices  $\mathbf{t}_1$  and  $\mathbf{t}_2$  for either eigenpolarization of the incoming field.
